# Supplementary material for: Flexibility in MOFs: do scalar and group-theoretical counting rules work?
Source: Royal Society of Chemistry journal article supplement (doi:10.1039/c5dt03586d), 2015-12-24
Supplement: c5dt03586d1.xlsx [file c5dt03586d1.xlsx]

## Sheet: D4h
Character Table
			1	2	1	2	2	1	2	1	2	2	16
		D4h	E	2C4	C2	2C2'	2C2''	i	2S4	σh	2σv	2σd
		A1g	1	1	1	1	1	1	1	1	1	1		x2 + y2, z2
		A2g	1	1	1	-1	-1	1	1	1	-1	-1	Rz
		B1g	1	-1	1	1	-1	1	-1	1	1	-1		x2 - y2
		B2g	1	-1	1	-1	1	1	-1	1	-1	1		xy
		Eg	2	0	-2	0	0	2	0	-2	0	0	(Rx, Ry)	(xz, yz)
		A1u	1	1	1	1	1	-1	-1	-1	-1	-1
		A2u	1	1	1	-1	-1	-1	-1	-1	1	1	z
		B1u	1	-1	1	1	-1	-1	1	-1	-1	1
		B2u	1	-1	1	-1	1	-1	1	-1	1	-1
		Eu	2	0	-2	0	0	-2	0	2	0	0	(x, y)
Representation
		Γ	-6	2	-2	0	2	0	0	4	6	0	6
Reduced Representation
	1	A1g
	-1	A2g
	0	B1g
	-1	B2g
	-1	Eg
	-1	A1u
	0	A2u
	-2	B1u
	0	B2u
	0	Eu
		D4h	E	2C4	C2	2C2'	2C2''	i	2S4	σh	2σv	2σd
		ΓT+ΓG	6	2	-2	-2	-2	0	0	0	0	0
		v	10	2	2	0	0	0	0	0	0	0
		e	12	0	0	-2	0	0	0	0	0	0
		0	1	1	1	1	1	1	1	1	1	1
			-18	2	-2	-2	2	0	0	0	0	0
		Γf	12	0	0	2	0	0	0	4	6	0
			-6	2	-2	0	2	0	0	4	6	0

## Sheet: Td
Character Table
			1	8	3	6	6	24
		Td	E	8C3	3C2	6S4	6σd
		A1	1	1	1	1	1		x2 + y2 + z2
		A2	1	1	1	-1	-1
		E	2	-1	2	0	0		(2z2 - x2 - y2, x2 - y2)
		T1	3	0	-1	1	-1	(Rx, Ry, Rz)
		T2	3	0	-1	-1	1	(x, y, z)	(xz, yz, xy)
Representation
		Γ	-60	0	-4	0	0
Reduced Representation
	-3	A1
	-3	A2
	-6	E
	-7	T1
	-7	T2
IRMOF		Td	E	8C3	3C2	6S4	6σd
		ΓT+ΓG	6	0	-2	0	0
		v	81	0	5	0	0
		e	108	0	4	0	0
		0	1	1	1	1	1
			-168	0	0	0	0
		Γf	108	0	-4	0	0
			-60	0	-4	0	0		no mechanism !!!!!!

## Sheet: Oh
Character Table
			1	8	6	6	3	1	6	8	3	6	48
		Oh	E	8C3	6C2	6C4	3C2(=C42)	i	6S4	8S6	3σh	6σd
		A1g	1	1	1	1	1	1	1	1	1	1		x2 + y2 + z2
		A2g	1	1	-1	-1	1	1	-1	1	1	-1
		Eg	2	-1	0	0	2	2	0	-1	2	0		(2z2 - x2 - y2, x2 - y2)
		T1g	3	0	-1	1	-1	3	1	0	-1	-1	(Rx, Ry, Rz)
		T2g	3	0	1	-1	-1	3	-1	0	-1	1		(xz, yz, xy)
		A1u	1	1	1	1	1	-1	-1	-1	-1	-1
		A2u	1	1	-1	-1	1	-1	1	-1	-1	1
		Eu	2	-1	0	0	2	-2	0	1	-2	0
		T1u	3	0	-1	1	-1	-3	-1	0	1	1	(x, y, z)
		T2u	3	0	1	-1	-1	-3	1	0	1	-1
Representation
		Γ	-6	0	-2	-2	2	0	0	0	0	4	-4
Reduced Representation
	0	A1g
	0	A2g
	0	Eg
	-1	T1g
	0	T2g
	-1	A1u
	1	A2u
	0	Eu
	0	T1u
	-1	T2u
Big pores		Oh	E	8C3	6C2	6C4	3C2(=C42)	i	6S4	8S6	3σh	6σd
		ΓT+ΓG	6	0	-2	2	-2	0	0	0	0	0
		v	20	0	2	0	0	0	0	0	0	0
		e	24	0	0	0	0	0	0	0	0	0
		0	1	1	1	1	1	1	1	1	1	1
			-30	0	-2	-2	2	0	0	0	0	0
		Γf	24	0	0	0	0	0	0	0	0	4
			-6	0	-2	-2	2	0	0	0	0	4
		A2u	1	1	-1	-1	1	-1	1	-1	-1	1
Small pores		Oh	E	8C3	6C2	6C4	3C2(=C42)	i	6S4	8S6	3σh	6σd
		ΓT+ΓG	6	0	-2	2	-2	0	0	0	0	0
		v	20	0	2	0	0	0	0	0	0	0
		e	24	0	0	0	0	0	0	0	0	0
		0	1	1	1	1	1	1	1	1	1	1
			-30	0	-2	-2	2	0	0	0	0	0
		Γf	24	0	0	0	0	0	0	0	0	-4
			-6	0	-2	-2	2	0	0	0	0	-4
		A2g	1	1	-1	-1	1	1	-1	1	1	-1
			8
